# Supplementary material
Source: publisher figshare collection journal article supplement (https://acs.figshare.com/ndownloader/files/20305227)
Supplement: Supplementary file 1 [file 20305227]

## Sheet: PTGS
Gene SYMBOL	ENTREZID
FAM48A	55578
NUPL1	9818
ZNF435	80345
SIP1	8487
WDR67	93594
ZFP161	7541
CENPC1	1060
ZNF588	51427
POLS	11044
RBM16	22828
SUV420H1	51111
KIAA0020	9933
ORC1L	4998
SDCCAG1	9147
SFRS12	140890
IL8	3576
SRPR	6734
PBEF1	10135
KIAA0528	9847
TADA2L	6871
MTERF	7978
PMS2L1	5379
KIAA0802	23255
ZNF192	7745
PPAP2A	8611
ZNF187	7741
FUSIP1	10772
ADFP	123
CD97	976
SFRS9	8683
SFRS3	6428
WAPAL	23063
ORC2L	4999
HNRPDL	9987
CAMSAP1L1	23271
KIAA0947	23379
KIAA1279	26128
PIP5K2B	8396
KIAA0174	9798
KIAA1012	22878
SFRS4	6429
PFTK1	5218
SR140	23350
BAT2D1	23215
KIAA1128	54462
CDC45L	8318
CDC2	983
MYST3	7994
ARMET	7873
C10orf119	79892
KIAA0146	23514
NP	956531
CTSL2	1515
HRSP12	10247
LENG4	79143
CXCR7	57007
ORC6L	23594
PALM2-AKAP2	445815
MTHFD2L	441024
MAST4	375449
FRYL	285527
RABL3	285282
JMJD1C	221037
USP12	219333
TUBB	203068
ASXL1	171023
ANKRD46	157567
HSPB6	126393
FTSJ3	117246
OSR2	116039
LRRC42	115353
MRFAP1L1	114932
LARP4	113251
H2AFV	94239
YTHDC1	91746
STARD13	90627
ABCC10	89845
DIXDC1	85458
TSPYL5	85453
ARID5B	84159
TM2D1	83941
RBM4B	83759
TMEM47	83604
SH3BGRL3	83442
KIF18A	81930
SPRY4	81848
MAP1LC3B	81631
FBXO38	81545
THUMPD2	80745
PRR3	80742
ULBP2	80328
FLAD1	80308
CHD9	80205
PTGES2	80142
RMI1	80010
GRHL2	79977
CEP76	79959
SLTM	79811
E2F8	79733
PRKRIP1	79706
ZCCHC6	79670
CHAC1	79094
SPATA5L1	79029
TMEM106C	79022
MARCKSL1	65108
RBM15	64783
FNDC3B	64778
SMURF2	64750
DCLRE1C	64421
NOC3L	64318
IFIH1	64135
MAGEF1	64110
TSPYL2	64061
RBM25	58517
TRIB3	57761
KIAA1462	57608
CLK4	57396
PELI1	57162
SCYL3	57147
ANKMY2	57037
CCNL1	57018
FEM1C	56929
C8orf4	56892
ZC3HAV1	56829
CHST7	56548
PPAN	56342
KLHL9	55958
WDR12	55759
ASF1B	55723
PNRC2	55629
THUMPD1	55623
ZCCHC8	55596
ENOSF1	55556
RBM38	55544
ZNF331	55422
MCM10	55388
PSPC1	55269
YY1AP1	55249
RIC8B	55188
VPS13D	55187
RIF1	55183
CEP55	55165
FANCL	55120
PRPF38B	55119
CDCA4	55038
SEMA4C	54910
DPP8	54878
FNBP1L	54874
SNRK	54861
ZCCHC10	54819
RNF111	54778
OTUD4	54726
RSBN1	54665
LZTFL1	54585
ING3	54556
DDIT4	54541
NLE1	54475
SLC38A2	54407
BRWD1	54014
ARID4B	51742
CAB39	51719
ZNF44	51710
ASB1	51665
GINS2	51659
ERGIC3	51614
TRIM33	51592
AZIN1	51582
DTL	51514
LIMA1	51474
GULP1	51454
AMOTL2	51421
NOL7	51406
CRLF3	51379
UCHL5	51377
TNFRSF12A	51330
WAC	51322
PHF21A	51317
SLC25A37	51312
FAM53C	51307
IER5	51278
INSIG2	51141
ANGPTL4	51129
RDH11	51109
UTP18	51096
GAL	51083
RPS27L	51065
GMNN	51053
F11R	50848
ITSN2	50618
PIK3R4	30849
DNTTIP2	30836
BAZ2B	29994
NRBF2	29982
SCHIP1	29970
SAC3D1	29901
RBM15B	29890
GNL2	29889
UBN1	29855
RACGAP1	29127
TBK1	29110
MRPL15	29088
ATAD2	29028
MRPS18B	28973
SLCO4A1	28231
TMEM97	27346
ZNF638	27332
AHDC1	27245
SNX5	27131
BBC3	27113
TAF5L	27097
LAMP3	27074
ATP2C1	27032
MLH3	27030
RANBP6	26953
INTS6	26512
MYCBP	26292
SACS	26278
FBXO9	26268
FBXL5	26234
PHGDH	26227
GAPVD1	26130
WSB1	26118
ANKRD17	26057
PPP1R16B	26051
ZNF451	26036
LRIG1	26018
ZZZ3	26009
NGDN	25983
NECAP1	25977
TIPARP	25976
KBTBD2	25948
SAMHD1	25939
RCHY1	25898
ABHD14A	25864
ANAPC13	25847
NIPBL	25836
DNAJB5	25822
ARIH1	25820
TNFAIP8	25816
BAMBI	25805
RAD54B	25788
ZNF318	24149
PANX1	24145
FTSJ1	24140
IFIT5	24138
KIF4A	24137
BRD1	23774
FLRT2	23768
MAFF	23764
PITPNB	23760
GABARAPL1	23710
PLXNB2	23654
PPP1R15A	23645
RABGAP1	23637
MKRN1	23608
CORO1C	23603
CDC42EP4	23580
ZNF281	23528
SRRM2	23524
R3HDM1	23518
SKIV2L2	23517
SLC39A14	23516
MORC3	23515
SUZ12	23512
TGDS	23483
PES1	23481
SEC61G	23480
PHF3	23469
CBX5	23468
TARDBP	23435
RYBP	23429
TDRD7	23424
ITGB3BP	23421
SIRT1	23411
DICER1	23405
FBXO46	23403
PPWD1	23398
LARS2	23395
ADNP	23394
SRGAP2	23380
PUM2	23369
PPP1R13B	23368
ZNF629	23361
FNBP4	23360
SMCHD1	23347
WDR7	23335
USP22	23326
KIAA1033	23325
TRIM2	23321
UBR2	23304
ANKS1A	23294
AGTPBP1	23287
CSTF2T	23283
DNMBP	23268
OTUD3	23252
KIAA0922	23240
ARHGEF9	23229
NUP210	23225
SULF1	23213
RRS1	23212
FBXL7	23194
RCOR1	23186
RFTN1	23180
CEP68	23177
TBC1D9	23158
DCUN1D4	23142
POGZ	23126
HIC2	23119
TNRC6B	23112
ZBTB43	23099
PPRC1	23082
MYCBP2	23077
NCOA6	23054
ZNF292	23036
DOPEY1	23033
TMCC1	23023
RAB21	23011
DAAM1	23002
TRIM32	22954
SLC4A1AP	22950
KIN	22944
DKK1	22943
ELL2	22936
RAB3GAP1	22930
NCBP2	22916
KIAA0907	22889
FOXJ3	22887
INPP5F	22876
SEC31A	22872
R3HDM2	22864
FNDC3A	22862
CHSY1	22856
CPEB3	22849
RAB11FIP2	22841
HSPA4L	22824
MTF2	22823
PHLDA1	22822
ATF5	22809
RRAS2	22800
TFEC	22797
GABARAPL2	11345
MGLL	11343
TUSC2	11334
STK38	11329
LYPLA2	11313
B4GALT7	11285
KLHL2	11275
XPOT	11260
PDCD10	11235
DUSP10	11221
AKAP10	11216
NISCH	11188
BAZ1A	11177
BAZ2A	11176
WDHD1	11169
TBC1D8	11138
ZWINT	11130
FAF1	11124
BTN2A1	11120
FGFR1OP	11116
RPP14	11102
DNAJB4	11080
TOPBP1	11073
DUSP14	11072
WWP1	11059
OGFR	11054
TLK2	11011
GLIPR1	11010
CKAP4	10970
MLLT11	10962
PNRC1	10957
SF3A3	10946
EHD1	10938
TCERG1	10915
PAPOLA	10914
TXNL4A	10907
BLCAP	10904
MTMR11	10903
BRD8	10902
HSPH1	10808
SEC24A	10802
MTHFD2	10797
ZNF274	10782
POP4	10775
PLK2	10769
GIPC1	10755
PLK4	10733
SLC12A7	10723
POLD3	10714
DCTN6	10671
CGREF1	10669
CTCF	10664
YKT6	10652
MTX2	10651
IGF2BP3	10643
RAD51AP1	10635
GAS2L1	10634
TXNIP	10628
POLR3F	10621
RBCK1	10616
HEXIM1	10614
AHSA1	10598
SMC2	10592
CCT4	10575
OLFM4	10562
RPP38	10557
PRDX4	10549
APPBP2	10513
CAP2	10486
SLC25A17	10478
FST	10468
PPIH	10465
BAIAP2	10458
HAX1	10456
IFI30	10437
CDC42EP2	10435
SEC24B	10427
TUBGCP3	10426
PGRMC2	10424
BASP1	10409
BTN3A3	10384
CITED2	10370
KLF2	10365
TNIP1	10318
ZNF267	10308
DLEU1	10301
DNAJA2	10294
SMNDC1	10285
NET1	10276
FSTL3	10272
POP7	10248
TRIB1	10221
PSMD14	10213
MPHOSPH6	10200
MPHOSPH9	10198
LHFPL2	10184
RBM5	10181
ABI2	10152
AKAP9	10142
OPTN	10133
TRAP1	10131
ZNF263	10127
KIF20A	10112
CTDSP2	10106
TSFM	10102
UST	10090
ABCF2	10061
SMC4	10051
DNAJB6	10049
CHAF1A	10036
GNE	10020
BCL2L11	10018
HDAC5	10014
HDAC6	10013
DMTF1	9988
NUP153	9972
USP3	9960
HS3ST3B1	9953
OXSR1	9943
KIF14	9928
ZBTB5	9925
RABGAP1L	9910
ZBED4	9889
FCHSD2	9873
SETDB1	9869
CEP350	9857
EPM2AIP1	9852
ZBTB24	9841
GINS1	9837
MELK	9833
DNAJC6	9829
TSC22D2	9819
KEAP1	9817
TOMM20	9804
CKAP5	9793
SERTAD2	9792
KIAA0232	9778
FRMPD4	9758
SLK	9748
HDAC9	9734
USP6NL	9712
HERPUD1	9709
KIAA0100	9703
TRAM2	9697
N4BP1	9683
SLC25A44	9673
ZNF432	9668
CEP135	9662
GCC2	9648
MICAL2	9645
IKBKE	9641
TRAF4	9618
RNF7	9616
RNF14	9604
PDIA4	9601
IER2	9592
CREB5	9586
RBM39	9584
NR1D1	9572
ATP6V1G1	9550
PTGES	9536
BAG2	9532
BAG3	9531
BAG5	9529
NPEPPS	9520
LITAF	9516
MAGED1	9500
KIF23	9493
PGS1	9489
CHST3	9469
ITM2B	9445
DDX23	9416
ARHGAP29	9411
RECQL4	9401
NMT2	9397
LIPG	9388
PPIG	9360
NDST3	9348
TCEAL1	9338
CNOT8	9337
GTF3C3	9330
GTF3C4	9329
TRIP4	9325
TRIP13	9319
KLF4	9314
CD83	9308
SOCS6	9306
BCL7B	9275
PIWIL1	9271
STK17B	9262
PDLIM7	9260
PTTG1	9232
BUB3	9184
ARHGEF2	9181
EXO1	9156
CCNE2	9134
PRPF3	9129
NMI	9111
MTMR4	9110
USP8	9101
USP10	9100
USP6	9098
PKMYT1	9088
PRC1	9055
GPRC5A	9052
BTAF1	9044
UBE2M	9040
MAP3K14	9020
TAF1C	9013
HSPB3	8988
H1FX	8971
BCL10	8915
CACNA1G	8913
MTMR3	8897
EIF2B5	8893
ARHGEF7	8874
IER3	8870
PER2	8864
TSC22D1	8848
CFLAR	8837
SOCS2	8835
INPP4B	8821
FGF18	8817
IL18RAP	8807
FBP2	8789
FADD	8772
RIPK2	8767
RAB11A	8766
TNFSF9	8744
RNGTT	8732
EED	8726
TRADD	8717
HYAL2	8692
IRS2	8660
DYNLL1	8655
OASL	8638
RNASET2	8635
JRK	8629
STC2	8614
KLF7	8609
SLC25A12	8604
AKR7A2	8574
CASK	8573
YARS	8565
PIAS1	8554
BLZF1	8548
PIR	8544
NIPSNAP1	8508
ENC1	8507
PIK3R3	8503
PPM1D	8493
TPST1	8460
CUL1	8454
CUL2	8453
DYRK2	8445
ZNF282	8427
BCAR3	8412
SPOP	8405
HIST1H4B	8366
HIST1H3B	8358
HIST1H3G	8355
HIST1H2BC	8347
HIST1H2BN	8341
HIST1H2AC	8334
FZD1	8321
CDC7	8317
USP9X	8239
C21orf33	8209
NRIP1	8204
NCOA3	8202
ZNF239	8187
COIL	8161
SLC7A5	8140
FOSL1	8061
SHOC2	8036
SLC25A16	8034
CCDC6	8030
STAM	8027
NR4A3	8013
ZNF212	7988
SLBP	7884
CXCR4	7852
BTG2	7832
LAPTM5	7805
LRP8	7804
ZNF232	7775
ZNF227	7770
ZNF217	7764
ZFAND5	7763
ZNF205	7755
ZNF195	7748
ZNF189	7743
RNF113A	7737
ZNF180	7733
ZNF165	7718
ZNF148	7707
ZNF146	7705
ZNF136	7695
ZNF131	7690
ZNF76	7629
ZNF45	7596
ZNF35	7584
ZNF23	7571
ZNF22	7570
ZNF14	7561
ZNF3	7551
ZFX	7543
ZFP36	7538
XRCC5	7520
XPO1	7514
XPC	7508
XBP1	7494
WEE1	7465
WARS	7453
VRK1	7443
VLDLR	7436
VCL	7414
USP1	7398
UPP1	7378
UNG	7374
UMPS	7372
UGCG	7357
UCHL3	7347
UBTF	7343
UBE2N	7334
UBE2L3	7332
UBE2H	7328
UBE2G1	7326
UBE2B	7320
UBC	7316
TYMS	7298
TXNRD1	7296
TUFT1	7286
TTF1	7270
PHLDA2	7262
TSG101	7251
TRIO	7204
TRAF3	7187
TPM2	7169
TOP2A	7153
TOP1	7150
TNFRSF1B	7133
TNFRSF1A	7132
TNFAIP6	7130
TNFAIP3	7128
TNFAIP2	7127
TNF	7124
TLR2	7097
TIMP3	7078
TIMP2	7077
TIMP1	7076
TIAM1	7074
TIAL1	7073
TIA1	7072
KLF10	7071
THBD	7056
TGM2	7052
TGFBI	7045
TGFB3	7043
TGFB2	7042
TFRC	7037
TFE3	7030
TFDP1	7027
NR2F2	7026
TFAP4	7023
TFAP2C	7022
TFAM	7019
TF	7018
TEK	7010
TCP1	6950
MLX	6945
TCF21	6943
TCF12	6938
TCF7L2	6934
TBX3	6926
TCEA2	6919
TBCC	6903
TARS	6897
TAPBP	6892
TAP1	6890
TAF5	6877
TAF2	6873
SYK	6850
SURF1	6834
SUPV3L1	6832
SUOX	6821
STXBP3	6814
STX3	6809
AURKA	6790
STK4	6789
STK3	6788
NEK4	6787
STAT6	6778
STAT3	6774
STAT1	6772
SSFA2	6744
TRIM21	6737
SRPK2	6733
SRP54	6729
SRF	6722
SPTBN1	6711
UAP1	6675
SP1	6667
SOX15	6665
SOX4	6659
SOS1	6654
SON	6651
SOD1	6647
SNRPE	6635
SNRPD1	6632
FSCN1	6624
SNAPC1	6617
SNAI1	6615
SNAI2	6591
SLC20A1	6574
SLC9A1	6548
SMTN	6525
SLC3A2	6520
SLC2A1	6513
SLC1A5	6510
SLC1A4	6509
SKIV2L	6499
SIX1	6495
SIPA1	6494
STIL	6491
SIAH2	6478
SIAH1	6477
SHOX2	6474
SHC1	6464
ITSN1	6453
SH3BP2	6452
SCG5	6447
SFPQ	6421
MAP2K4	6416
SDCBP	6386
SDC4	6385
CXCL6	6372
CCL11	6356
CCL7	6354
CCL5	6352
CCL4	6351
SCD	6319
SARS	6301
S100P	6286
RXRA	6256
RRM2	6241
RREB1	6239
RRAD	6236
RPS6KB2	6199
RPS4Y1	6192
RPN2	6185
MRPS12	6183
RPA3	6119
RPA1	6117
RNF6	6049
BRD2	6046
RLF	6018
RGS16	6004
RGS3	5998
RGS2	5997
RFC5	5985
RFC4	5984
RFC3	5983
RFC2	5982
RFC1	5981
REV3L	5980
RELB	5971
RELA	5970
REL	5966
RBBP6	5930
RASA1	5921
RARS	5917
RANBP2	5903
RANBP1	5902
RAD51C	5889
RAD51	5888
RAC2	5880
RAB5C	5878
RABGGTB	5876
RAB27A	5873
RAB5A	5868
PYCR1	5831
RAD1	5810
PTX3	5806
PTPRK	5796
PTPRE	5791
PTPN3	5774
PTPN2	5771
PTN	5764
PTK2	5747
PTGS2	5743
PSPH	5723
PSMD12	5718
PSMD11	5717
PSMD8	5714
PSMC2	5701
PSAP	5660
PRPS1	5631
PRNP	5621
MAP2K3	5606
MAP2K1	5604
MAPK9	5601
MAPK6	5597
PRKAB1	5564
PRKAA1	5562
PRIM1	5557
PPP2R2A	5520
PPP2R1A	5518
PPP1CC	5501
PPM1B	5495
PPM1A	5494
PPAT	5471
PPARA	5465
POU2F1	5451
POLR2C	5432
POLG	5428
POLE2	5427
POLE	5426
POLD2	5425
POLD1	5424
POLA1	5422
PMS1	5378
PMP22	5376
PMM2	5373
PML	5371
PMAIP1	5366
PLSCR1	5359
PLOD2	5352
PLOD1	5351
PLAUR	5329
PLAU	5328
PLAT	5327
PLA2G4A	5321
PKD2	5311
PITX2	5308
PIK3R1	5295
PIM1	5292
PIK3C3	5289
SERPINB5	5268
PHF1	5252
PHB	5245
PGD	5226
PEX14	5195
PEX13	5194
PEX1	5189
PER1	5187
PDGFB	5155
PDGFA	5154
PDE4B	5142
PCNT	5116
PCNA	5111
PCK2	5106
PCDH9	5101
PCCA	5095
PAWR	5074
PAPPA	5069
SERPINB2	5055
SERPINE1	5054
PAFAH1B1	5048
FURIN	5045
PA2G4	5036
OSBP	5007
OLR1	4973
NR4A2	4929
NUP98	4928
NTF3	4908
NPAT	4863
CNOT4	4850
CNOT2	4848
NONO	4841
NHLH2	4808
NFYA	4800
NFKBIE	4794
NFKBIB	4793
NFKBIA	4792
NFKB2	4791
NFKB1	4790
NFIL3	4783
NFIC	4782
NFIB	4781
NFE2L2	4780
NF1	4763
NEU1	4758
NEDD9	4739
NDUFB7	4713
NDUFA9	4704
NCK1	4690
NCF2	4688
NBN	4683
NASP	4678
NARS	4677
NAP1L1	4673
NAB2	4665
PPP1R12A	4659
MYO10	4651
MYD88	4615
MYC	4609
MYBL2	4605
MYBL1	4603
MYB	4602
MX2	4600
MVD	4597
TRIM37	4591
MTM1	4534
MTHFD1	4522
NUDT1	4521
MTF1	4520
MT2A	4502
MSH2	4436
ABCC1	4363
MPV17	4358
MNAT1	4331
MMP1	4312
MKLN1	4289
MKI67	4288
MITF	4286
MGMT	4255
MAP3K5	4217
MAP3K4	4216
MAP3K1	4214
MEIS2	4212
MEIS1	4211
MEF2A	4205
ME1	4199
MDK	4192
DNAJB9	4189
MCM7	4176
MCM6	4175
MCM5	4174
MCM4	4173
MCM3	4172
MCM2	4171
MAZ	4150
MATN2	4147
MAT2A	4144
MARS	4141
MARK3	4140
MAP1B	4131
MAFG	4097
SMAD7	4092
SMAD4	4089
SMAD3	4088
MAD2L1	4085
MXD1	4084
TACSTD2	4070
LYN	4067
LRP6	4040
LPP	4026
FADS1	3992
LIMS1	3987
LIMK2	3985
LIF	3976
LGALS8	3964
LDLR	3949
LCP2	3937
LCN2	3934
LAMB3	3914
LAMA5	3911
LAMA4	3910
KRT17	3872
KRT14	3861
KRT10	3858
KRT7	3855
KPNA5	3841
KIF11	3832
KIF5C	3800
KIF2A	3796
KCNK1	3775
KCNA1	3736
JUND	3727
JUNB	3726
JUN	3725
ITPR1	3708
ITPKB	3707
ITGA2	3673
ISG20	3669
IRS1	3667
IRF7	3665
IRF1	3659
INHBB	3625
IMPA2	3613
ILF3	3609
ILF2	3608
FOXK2	3607
IL18	3606
TNFRSF9	3604
IL15RA	3601
IL15	3600
IL11	3589
IL10RA	3587
IL7R	3575
IL6	3569
IL4R	3566
IL1RAP	3556
IL1B	3553
CYR61	3491
IGFBP7	3490
IGFBP3	3486
IGFBP2	3485
IGF2	3481
IGF1R	3480
IFRD1	3475
IFNG	3458
IFI16	3428
IDI1	3422
IDH1	3417
ID4	3400
ID3	3399
ID2	3398
ICAM1	3383
IARS	3376
NDST1	3340
DNAJB1	3337
HSP90AB1	3326
HSPA8	3312
HSPA1L	3305
DNAJA1	3301
HSF2	3298
HES1	3280
HRAS	3265
NR4A1	3164
HMGCR	3156
HMGCL	3155
HMGB2	3148
HLA-E	3133
HLA-C	3107
HLA-B	3106
HLA-A	3105
HIVEP1	3096
NRG1	3084
HELLS	3070
HDAC2	3066
HARS	3035
HADHB	3032
H3F3B	3021
H2AFX	3014
HIST1H2AE	3012
GZMB	3002
GUK1	2987
GTF3A	2971
GTF2H1	2965
GTF2F2	2963
GTF2E1	2960
GTF2B	2959
GTF2A2	2958
MSH6	2956
CXCL3	2921
CXCL2	2920
CXCL1	2919
GRN	2896
GRB7	2886
GPS2	2874
SFN	2810
GNRH1	2796
GLUL	2752
GLRX	2745
GCLC	2729
GLB1	2720
GLA	2717
GEM	2669
GCNT1	2650
GBP1	2633
GBE1	2632
GBAS	2631
GATA3	2625
GATA2	2624
GAS1	2619
GARS	2617
GALNT3	2591
GAD1	2571
G6PD	2539
FZD2	2535
FYN	2534
FUT8	2530
FTH1	2495
FOSL2	2355
FOSB	2354
FOS	2353
FNTA	2339
FOXM1	2305
FKBP4	2288
FHL2	2274
FHL1	2273
FGFR3	2261
FGF2	2247
FEN1	2237
EFEMP1	2202
F3	2152
EZH2	2146
ETS2	2114
ETFB	2109
ERF	2077
ERCC5	2073
ERCC2	2068
ERCC1	2067
EPRS	2058
EPHA4	2043
EPAS1	2034
EP300	2033
SLC29A1	2030
EMP1	2012
ELF4	2000
ELF3	1999
ELF1	1997
SERPINB1	1992
EIF5	1983
EIF4EBP1	1978
EIF4E	1977
EPHA2	1969
EIF1AX	1964
EGR4	1961
EGR3	1960
EGR2	1959
EGR1	1958
EGFR	1956
MEGF9	1955
EFNB2	1948
EFNA5	1946
EFNA1	1942
PHC2	1912
ECHS1	1892
E2F5	1875
E2F4	1874
E2F3	1871
E2F1	1869
DYRK1A	1859
DUT	1854
DUSP8	1850
DUSP6	1848
DUSP4	1846
DUSP1	1843
DTYMK	1841
HBEGF	1839
DTNA	1837
TSC22D3	1831
ARID3A	1820
DR1	1810
DLX2	1746
DHX15	1665
DDX11	1663
DDX10	1662
DDIT3	1649
GADD45A	1647
DDB2	1643
DCK	1633
DAG1	1605
CD55	1604
CYP27B1	1594
CYP2J2	1573
CYP1B1	1545
CX3CR1	1524
CTSH	1512
CTSE	1510
CTNND1	1500
CTH	1491
CTGF	1490
CSTF2	1478
CSTF1	1477
CST6	1474
CSRP1	1465
CSNK1D	1453
CSE1L	1434
CRY1	1407
CRKL	1399
CRK	1398
CREM	1390
CREBBP	1387
ATF2	1386
CPT1A	1374
CPOX	1371
CLDN4	1364
COX7A2	1347
KLF6	1316
COL19A1	1310
COL15A1	1306
COL6A1	1291
CNN1	1264
CLTB	1212
TPP1	1200
CLK3	1198
CLK1	1195
CLIC1	1192
CLU	1191
CHUK	1147
CHKA	1119
CHEK1	1111
CHD1	1105
CETN3	1070
CENPF	1063
CENPE	1062
CENPA	1058
CEBPG	1054
CEBPB	1051
CDR2	1039
CDKN2C	1031
CDKN1B	1027
CDKN1A	1026
CDK7	1022
CDK4	1019
CDK2	1017
CDH2	1000
CDC27	996
CDC25A	993
CDC20	991
CDC6	990
CD59	966
CD44	960
CD9	928
CD8B	926
CCNT2	905
CCNH	902
CCNE1	898
CCNB1	891
CCNA2	890
SERPINH1	871
CBLB	868
CBFA2T3	863
RUNX1	861
CASP8	841
CASP3	836
CASP1	834
CARS	833
CAPN1	823
CALU	813
BTG1	694
BTF3	689
KLF5	688
KLF9	687
BSG	682
ZFP36L2	678
BRCA2	675
BRAF	673
BRCA1	672
BNIP3	664
BNIP1	662
BMPR1A	657
BLM	641
BIK	638
BICD1	636
BDKRB2	624
BCR	613
BCL7A	605
BCL6	604
BCL3	602
CCND1	595
BARD1	580
BACH1	571
B2M	567
ATP6V0A1	535
ATP6V1B2	526
ATP2B1	490
ATP1B1	481
ATP1A1	476
RERE	473
ASS1	445
ASNS	440
ASNA1	439
ASAH1	427
ARNTL	406
RND3	390
RHOB	388
ARG2	384
ARF6	382
BIRC3	330
BIRC2	329
APEX1	328
ANXA2P3	305
ANXA2	302
SLC25A6	293
AMD1	262
ALDOA	226
ALAD	210
AKT1	207
AHR	196
AHCY	191
AGTR1	185
PARP1	142
ADORA2B	136
ADM	133
ADH5	128
ADCY9	115
ADAM8	101
ACVR2A	92
ACVR1	90
ACTG1	71
ACAA1	30
ABL1	25
ABAT	18
AARS	16
AAMP	14
NAT1	9
